# Supplementary material
Source: Springer Nature journal article supplement (https://www.springermedizin.de/resource/supplementary/12936_2008_698_MOESM14_ESM.pdf/9548026)
Supplement: MOESM14 [file 9548026]

Molecular Barcode

Single

Mixed

Single

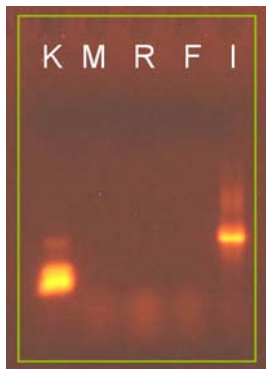

T  
A  
C  
C  
C  
C  
A  
G  
A  
C  
T  
X  
T  
C  
A  
A  
T  
T  
A  
A  
C  
C  
T  
G

Malawi CF04.009\_1G

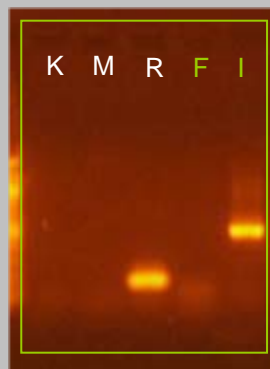

N  
A  
N  
T  
N  
C  
N  
G  
N  
T  
T  
A  
T  
N  
C  
C  
T  
T  
N  
G  
C  
N  
T  
G

Senegal P136.05

Mixed

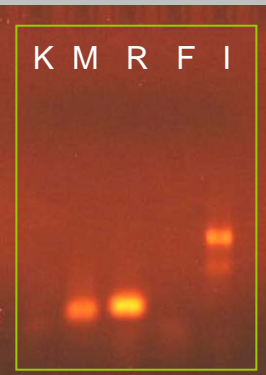

T  
A  
C  
T  
C  
G  
G  
A  
A  
T  
C  
A  
C  
C  
A  
A  
C  
T  
A  
G  
C  
C  
T  
G

Senegal V130.05

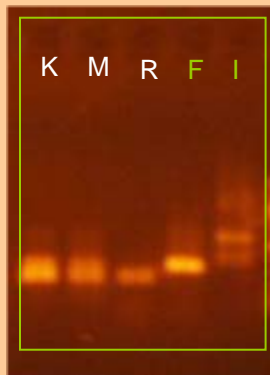

N  
A  
N  
N  
C  
N  
G  
N  
A  
C  
N  
N  
N  
N  
N  
N  
C  
N  
A  
A  
G  
C  
N  
T  
G

Senegal V83.05

|   | Gene | Type   |
|---|------|--------|
| K | MSP1 | K1     |
| M | MSP1 | MAD20  |
| R | MSP1 | RO33   |
| F | MSP2 | FC27   |
| I | MSP2 | 3D7/IC |
